# Supplementary material
Source: Springer Nature journal article supplement (https://www.springermedizin.de/resource/supplementary/12885_2013_4456_MOESM1_ESM.pdf/9466468)
Supplement: MOESM1 [file 9466468]

## Additional file 1 – Primer sequences

**Table S1:** Primers used to construct *Ch25h* promoter fragments

| Primer Name    | Sequence 5' to 3'                   |
|----------------|-------------------------------------|
| Ch25h-9-fwd    | GGGGATCCCTCGAGCTAGGGCACTCTCCTTGGAT  |
| Ch25h-10-fwd   | GGGGATCCCTCGAGGTGTTAAGCCTCCGTTCTCCA |
| Ch25h-11-fwd   | GGGGATCCCTCGAGCACAGGACCCAGTACCAGCA  |
| Ch25h-11.5-fwd | GGGGATCCCTCGAGCCAGGGAATTCTGCTTTGG   |
| Ch25h-12-rev   | GGGTGCGACTGCTGAGACTATGTCCCACAAT     |

**Table S2:** Walking ChIP primers for the *Ch25h* promoter

| Primer Name | Sequence 5' to 3'         |
|-------------|---------------------------|
| Ch25h-1(+)  | ACATGTTCTTTTGAGTTGGTATCG  |
| Ch25h-1(-)  | TGGAGTGATTTCTCACCTGGA     |
| Ch25h-2(+)  | GTGAGAAATCACTCCATATACTT   |
| Ch25h-2(-)  | GCCAGACTTTGTAGTCTCCT      |
| Ch25h-3(+)  | ACAAAGTCTGGCTGCTTAGGA     |
| Ch25h-3(-)  | GACAGCTCATTTCATGGTGGGT    |
| Ch25h-4(+)  | TGCCTTTGCAATGGGAATCAC     |
| Ch25h-4(-)  | ACCAAAGAGCTAGAATGGGCA     |
| Ch25h-5(+)  | TCTAGCTCTTTGGTGTAGTCTTGT  |
| Ch25h-5(-)  | GAGGTGCACGCTCTTCATTC      |
| Ch25h-6(+)  | GCACCTCCTCTAACAGTGAT      |
| Ch25h-6(-)  | TGGAATTAATGCAAATAGTTAAGG  |
| Ch25h-7(+)  | TCTTAGTGGTTACCTGTGAAATACA |
| Ch25h-7(-)  | GGATTGTAGCTCTAGGAGCCTG    |
| Ch25h-8(+)  | GCTACAATCCCTGTTTTCTTTGG   |
| Ch25h-8(-)  | TCCAAGGAGAGTGCCCTAGA      |
| Ch25h-9(+)  | CTAGGGCACTCTCCTTGGAT      |
| Ch25h-9(-)  | ACCCGTAAAGGCTCACTCG       |
| Ch25h-10(+) | GTGTTAAGCCTCCGTTCTCCA     |
| Ch25h-10(-) | TCCGTTGCAGACAGGGATTG      |
| Ch25h-11(+) | CAACGGACCCAGTACCAGCA      |
| Ch25h-11(-) | ACGTAAAGAACTGTTTGCTTGCC   |
| Ch25h-12(+) | TTACGTCTGGGAAAGGGCT       |
| Ch25h-12(-) | TGCTGAGACTATGTCCCACAAT    |
| Ch25h-13(+) | CTCAGCATGGGCTGCTACAA      |
| Ch25h-13(-) | TTACGGAAGGCGAGAAGTCC      |
| Ch25h-14(+) | GGACTTCTCGCCTTCCGTAATA    |
| Ch25h-14(-) | GTACAGCCAGGGCACCTTAT      |
| Ch25h-15(+) | TGGCACCTGCTGCACCATAA      |
| Ch25h-15(-) | TCACGTGAAAGGTAAAGATGGTGA  |

**Table S3:** Walking ChIP primers for the distal (P1) *Hsd11b1* promoter

| Primer Name      | Sequence 5' to 3'         |
|------------------|---------------------------|
| Hsd11b1-P1-1(+)  | AACCTACAGTTTCTGACCCCT     |
| Hsd11b1-P1-1(-)  | ACCTGCTTCCACTTCCAAATCA    |
| Hsd11b1-P1-2(+)  | GGCTCAAGAGTTCAAGGTCAGT    |
| Hsd11b1-P1-2(-)  | GGCACAGTTGCACACCCATAA     |
| Hsd11b1-P1-3(+)  | CTGTGCCTGGCTAACAGTTTAGTTA |
| Hsd11b1-P1-3(-)  | GAGAAGCTGCAAGCAGCAAGG     |
| Hsd11b1-P1-4(+)  | CTGCTTGCAGCTTCTCTGGG      |
| Hsd11b1-P1-4(-)  | TGCCTGGTGCTGTTTGTATTTTC   |
| Hsd11b1-P1-5(+)  | CAAACAGCACCAGGCAATCC      |
| Hsd11b1-P1-5(-)  | TGGAAAGTTTCATAAGGCCTATTTT |
| Hsd11b1-P1-6(+)  | ACTGGAGTAGAACCAACAATAAA   |
| Hsd11b1-P1-6(-)  | TTCACTGAGAGGATGGAACTTTG   |
| Hsd11b1-P1-7(+)  | AGTGAAGTCAGGACCCACAC      |
| Hsd11b1-P1-7(-)  | CACATATTATGCACACACATGCAC  |
| Hsd11b1-P1-8(+)  | TGTGCATATGTGTGTCTGTGTG    |
| Hsd11b1-P1-8(-)  | TCAATACATAATGTGCGCATAAC   |
| Hsd11b1-P1-9(+)  | CGCACATTATGTATTGATGTGTGTA |
| Hsd11b1-P1-9(-)  | TGCATACACATGCAGACTCAC     |
| Hsd11b1-P1-10(+) | TGCATGTGTATGCATGTGTGTG    |
| Hsd11b1-P1-10(-) | CTGATACTTTCTGTAGGCCTGTGT  |
| Hsd11b1-P1-11(+) | AGTCTCTCCTTGTGGGGAAGAA    |
| Hsd11b1-P1-11(-) | GCAGTCTGGTGTGGAGATGTTTA   |
| Hsd11b1-P1-12(+) | GTCCCCCTGTCCTTTGGGGAG     |
| Hsd11b1-P1-12(-) | TCTTTGGGGAGGGGCAGGATT     |
| Hsd11b1-P1-13(+) | CCCCTCCCCAAAGAGTGAGA      |
| Hsd11b1-P1-13(-) | GACCTGTTAGCCCTACTGTGT     |
| Hsd11b1-P1-14(+) | AGGGCTAACAGGTCTGAAAAGAA   |
| Hsd11b1-P1-14(-) | GACTTCCCACAGCCTTAGCA      |

**Table S4:** Walking ChIP primers for the proximal (P2) *Hsd11b1* promoter

| Primer Name     | Sequence 5' to 3'       |
|-----------------|-------------------------|
| Hsd11b1-P2-1(+) | ATGTACAAGGATCCCCAGAGC   |
| Hsd11b1-P2-1(-) | GTGAGCTTGTGTGTGAGAGC    |
| Hsd11b1-P2-2(+) | GAGGCTCTCACACAAGCTC     |
| Hsd11b1-P2-2(-) | AAAGTCTTGCTATGCAACCCA   |
| Hsd11b1-P2-3(+) | GGGTTGCATAGCAAGACTTTGA  |
| Hsd11b1-P2-3(-) | GTGACAGTCCAACACTGTCTCT  |
| Hsd11b1-P2-4(+) | ACTTGAGCCACTGATCAGCAT   |
| Hsd11b1-P2-4(-) | AAGAAAGGGATGAGAGAGTGGG  |
| Hsd11b1-P2-5(+) | ATCCCTTTCTTTTCTCTGTCTTT |
| Hsd11b1-P2-5(-) | GGACTCCACGTTCCCTTACAG   |
| Hsd11b1-P2-6(+) | TCCTGTCTGTCATGTGTCTTGG  |
| Hsd11b1-P2-6(-) | GCCCAGAGGAGACGAAACAAT   |

|                  |                          |
|------------------|--------------------------|
| Hsd11b1-P2-7(+)  | CGTCTCCTCTGGGCCTTAAAT    |
| Hsd11b1-P2-7(-)  | TGTGAGTAACTGCAGAGCATGT   |
| Hsd11b1-P2-8(+)  | CTCACAGTTCAGGATTGGCTTT   |
| Hsd11b1-P2-8(-)  | ATCCAACAGGAGCATCAAGACA   |
| Hsd11b1-P2-9(+)  | TTACCTGGGACTTGGATGCTC    |
| Hsd11b1-P2-9(-)  | CTATAGCCACACTGCTCGCTC    |
| Hsd11b1-P2-10(+) | TGGTCTAGATCTTCTAGTCTGGC  |
| Hsd11b1-P2-10(-) | CACTCCAGTTCAATGAAAAAGCAT |
| Hsd11b1-P2-11(+) | GAAGTGGAGTGTGGGGCTTAT    |
| Hsd11b1-P2-11(-) | GCACCTAAGAACCCCTGAGC     |
| Hsd11b1-P2-12(+) | AGGTGCTGTTTCTCTCTGTGT    |
| Hsd11b1-P2-12(-) | AGAGGCAACTTCCAGATGGC     |
| Hsd11b1-P2-13(+) | TCTGGAAGTTGCCTCTTACTCA   |
| Hsd11b1-P2-13(-) | AGAGCTTTCTACAACCTCCCA    |
| Hsd11b1-P2-14(+) | GCAGGTTTTCTTCGTGTGTCC    |
| Hsd11b1-P2-14(-) | GGGTTTGAATCAGTGATGTAGGG  |
